# Supplementary material
Source: PubMed Central journal article supplement (PMC5068164)
Supplement: AEM.01672-16_zam999117453so1.pdf [file AEM.01672-16_zam999117453so1.pdf]

TABLE S1 Results of serological and molecular typing of the 80 *L. pneumophila* sg  
2-14 strains typed by SG

| No | Code of health inspection point | City code | AFLP (AF) type | SG |
|----|---------------------------------|-----------|----------------|----|
| 1  | O-1                             | P-1       | 1              | 3  |
| 2  | O-2                             | P-1       | 1              | 6  |
| 3  | H-1                             | P-2       | 1              | 6  |
| 4  | O-3                             | P-1       | 1              | 3  |
| 5  | O-2                             | P-1       | 1              | 6  |
| 6  | O-2                             | P-1       | 1              | 6  |
| 7  | H-2                             | P-3       | 1              | 6  |
| 8  | H-3                             | P-4       | 2              | 3  |
| 9  | H-4                             | P-5       | 2              | 3  |
| 10 | H-4                             | P-5       | 2              | 3  |
| 11 | SP-1                            | P-2       | 3              | 8  |
| 12 | SP-1                            | P-2       | 3              | 8  |
| 13 | O-4                             | P-1       | 3              | 6  |
| 14 | H-5                             | P-3       | 4              | 3  |
| 15 | H-5                             | P-3       | 4              | 3  |
| 16 | H-4                             | P-5       | 4              | 3  |
| 17 | H-5                             | P-3       | 5              | 6  |
| 18 | H-5                             | P-3       | 5              | 6  |
| 19 | H-5                             | P-3       | 5              | 6  |
| 20 | H-6                             | P-6       | 6              | 6  |
| 21 | O-5                             | P-1       | 6              | 6  |

|    |      |      |    |    |
|----|------|------|----|----|
| 22 | H-7  | P-6  | 6  | 6  |
| 23 | H-8  | P-7  | 6  | 6  |
| 24 | H-9  | P-8  | 7  | 3  |
| 25 | O-3  | P-1  | 8  | 3  |
| 26 | O-3  | P-1  | 8  | 3  |
| 27 | H-10 | P-1  | 8  | 3  |
| 28 | H-10 | P-1  | 8  | 3  |
| 29 | H-10 | P-1  | 8  | 3  |
| 30 | H-11 | P-9  | 8  | 3  |
| 31 | H-12 | P-10 | 8  | 6  |
| 32 | H-13 | P-9  | 8  | NT |
| 33 | H-14 | P-9  | 9  | 10 |
| 34 | H-10 | P-1  | 9  | 3  |
| 35 | H-15 | P-3  | 10 | 3  |
| 36 | H-16 | P-11 | 11 | 3  |
| 37 | H-16 | P-11 | 12 | 3  |
| 38 | H-17 | P-11 | 12 | 3  |
| 39 | H-16 | P-11 | 12 | 3  |
| 40 | H-18 | P-3  | 13 | 6  |
| 41 | O-6  | P-1  | 14 | 6  |
| 42 | H-19 | P-9  | 14 | 6  |
| 43 | O-7  | P-9  | 15 | 6  |
| 44 | H-7  | P-1  | 16 | 6  |
| 45 | F-4  | P-2  | 16 | 6  |
| 46 | H-20 | P-4  | 16 | 6  |

|    |      |      |    |    |
|----|------|------|----|----|
| 47 | H-21 | P-7  | 17 | 6  |
| 48 | H-21 | P-7  | 17 | 6  |
| 49 | H-20 | P-4  | 18 | 6  |
| 50 | F-2  | P-2  | 19 | NT |
| 51 | H-4  | P-5  | 20 | 8  |
| 52 | O-8  | P-1  | 21 | 3  |
| 53 | F-1  | P-3  | 22 | NT |
| 54 | H-22 | P-12 | 22 | 4  |
| 55 | F-2  | P-2  | 23 | 6  |
| 56 | H-5  | P-3  | 24 | NT |
| 57 | F-3  | P-2  | 25 | NT |
| 58 | H-23 | P-9  | 26 | NT |
| 59 | H-24 | P-3  | 27 | NT |
| 60 | H-24 | P-3  | 27 | NT |
| 61 | H-5  | P-3  | 28 | NT |
| 62 | H-22 | P-12 | 29 | 3  |
| 63 | H-22 | P-12 | 29 | 3  |
| 64 | H-25 | P-9  | 30 | 3  |
| 65 | H-4  | P-5  | 31 | 3  |
| 66 | H-26 | P-3  | 31 | 6  |
| 67 | H-27 | P-12 | 32 | 6  |
| 68 | H-28 | P-3  | 32 | 6  |
| 69 | F-2  | P-2  | 32 | 6  |
| 70 | F-2  | P-2  | 33 | 6  |
| 71 | F-2  | P-2  | 34 | 6  |

|    |      |      |    |    |
|----|------|------|----|----|
| 72 | H-1  | P-2  | 35 | 6  |
| 73 | F-1  | P-2  | 35 | 6  |
| 74 | F-1  | P-2  | 35 | 6  |
| 75 | F-1  | P-2  | 35 | 6  |
| 76 | F-1  | P-2  | 36 | 6  |
| 77 | H-21 | P-7  | 36 | 6  |
| 78 | H-29 | P-11 | 37 | 10 |
| 79 | H-30 | P-3  | 38 | 5  |
| 80 | H-16 | P-11 | 39 | NT |

---

O=House, H=Hotel, F=Ferry, SP=Sports center and C=City

P-2, P-3, P-4, P-7 belong to Attica.

P-1, P-5, P-6, P-8, P-9, P-10, P-11, P-12 belong to the rest Greece

TABLE S2 Results of molecular typing per serogroup of *Legionella pneumophila*

strains

| SG       | ST Type    | AFLP Type                                        |
|----------|------------|--------------------------------------------------|
| 3 (n=19) | 87 (n=5)   | 1 (n=2), 11 (n=1), 12 (n=2)                      |
|          | 728 (n=8)  | 8 (n=6), 9 (n=1), 21 (n=1)                       |
|          | 1929 (n=3) | 2 (n=3)                                          |
|          | 361 (n=1)  | 29 (n=1)                                         |
|          | 297 (n=1)  | 30 (n=1)                                         |
|          | 993 (n=1)  | 7 (n=1)                                          |
| 4 (n=1)  | 1226 (n=1) | 22 (n=1)                                         |
| 6 (n=28) | 2083 (n=5) | 5 (n=3), 6 (n=2)                                 |
|          | 153 (n=1)  | 13 (n=1)                                         |
|          | 81 (n=2)   | 16 (n=1), 18 (n=1)                               |
|          | 421 (n=2)  | 8 (n=1), 35 (n=1)                                |
|          | 461 (n=5)  | 1 (n=4), 3 (n=1)                                 |
|          | 2084(n=1)  | 6 (n=1)                                          |
|          | 2085(n=1)  | 6 (n=1)                                          |
|          | 1825 (n=1) | 1 (n=1)                                          |
|          | 68 (n=8)   | 15 (n=1), 16 (n=1), 17 (n=2), 35 (n=2), 36 (n=2) |
|          | 649 (n=1)  | 32 (n=1)                                         |
|          | 1999 (n=1) | 34(n=1)                                          |
| 8 (n=2)  | 1358 (n=2) | 3 (n=2)                                          |
| 10 (n=1) | 1930 (n=1) | 9 (n=1)                                          |
| NT (n=5) | 1575 (n=1) | 22 (n=1)                                         |
|          | 2082 (n=1) | 19 (n=1)                                         |

|            |          |
|------------|----------|
| 2086 (n=1) | 8 (n=1)  |
| 2087 (n=1) | 24 (n=1) |
| 2088 (n=1) | 28 (n=1) |
